# Supplementary material for: Identification of new protein-coding potential in Leishmania donovani using a proteogenomics approach
Source: Research Square preprint supplement (doi:10.21203/rs.3.rs-8719077/v1), 2026-02-13
Supplement: Supplementary file 2 [file 1b779542129cfdd9df0fc865.xlsx]

## Sheet: Sheet1
Chowdhury et al. (2025). Identification of N-terminal extensions in Leishmania donovani using a proteogenomics approach Supplementary Table 2: N-terminal extensions in promastigote stages of Leishmania donovani
Note: Peptide-level evidence for these proteins is visualised in Supplementary Figure 2.
Peptide sequence	# PSMs	Master Protein Accessions	Positions in Master Proteins	L. donovani orthologs	Other Leishmania species orthologs	Category	Description (Domain structure)
HLSPGELALPQHPR	1	CP029507_+_481465-483264_ORF6674	CP029507_+_481465-483264_ORF6674 [85-98]	LdCL_080016400-t42_1-p1 | transcript=LdCL_080016400-t42_1 | gene=LdCL_080016400 | organism=Leishmania_donovani_CL-SL | gene_product=guide RNA binding protein, putative | transcript_product=guide RNA binding protein, putative | location=CP029507:481936-483264(+) | protein_length=442 | sequence_SO=chromosome | SO=protein_coding_gene | is_pseudo=false Length=442	LTRL590_080015100.1-p1 | transcript=LTRL590_080015100.1 | gene=LTRL590_080015100 | organism=Leishmania_tropica_L590 | gene_product=MRB1-associated protein, putative | transcript_product=MRB1-associated protein, putative | location=LtrL590_08:399761-401428(+) | protein_length=555 | sequence_SO=chromosome | SO=protein_coding_gene | is_pseudo=false Length=555	N-terminal extension	Guide RNA binding protein
KGAQPSAEEIESQLR	2	CP029508_-_552762-558095_ORF8646	CP029508_-_552762-558095_ORF8646 [174-188]	N-terminal extension LdCL_090022400-t42_1-p1 | transcript=LdCL_090022400-t42_1 | gene=LdCL_090022400 | organism=Leishmania_donovani_CL-SL | gene_product=hypothetical protein | transcript_product=hypothetical protein | location=CP029508:552762-557396(-) | protein_length=1544 | sequence_SO=chromosome | SO=protein_coding_gene | is_pseudo=false Length=1544	LTRL590_090022500.1-p1 | transcript=LTRL590_090022500.1 | gene=LTRL590_090022500 | organism=Leishmania_tropica_L590 | gene_product=hypothetical protein, conserved | transcript_product=hypothetical protein, conserved | location=LtrL590_09:564303-569231(-) | protein_length=1642 | sequence_SO=chromosome | SO=protein_coding_gene | is_pseudo=false Length=1642	N-terminal extension	Hypothetical protein (No domain)
DLIIDVLHHAATGGSVPVSEK	1	CP029508_+_16695-20693_ORF326	CP029508_+_16695-20693_ORF326 [41-61]	N-terminal extension LdCL_090005800-t42_1-p1 | transcript=LdCL_090005800-t42_1 | gene=LdCL_090005800 | organism=Leishmania_donovani_CL-SL | gene_product=RNA helicase, putative | transcript_product=RNA helicase, putative | location=CP029508:16989-20693(+) | protein_length=1234 | sequence_SO=chromosome | SO=protein_coding_gene | is_pseudo=false Length=1234	LdBPK_090090.1.1-p1 | transcript=LdBPK_090090.1.1 | gene=LdBPK_090090.1 | organism=Leishmania_donovani_BPK282A1 | gene_product=RNA helicase, putative | transcript_product=RNA helicase, putative | location=Ld09_v01s1:21950-25891(+) | protein_length=1313 | sequence_SO=chromosome | SO=protein_coding_gene | is_pseudo=false Length=1313	N-terminal extension	RNA helicase
WTWSCYPTTSK	2	CP029509_+_140192-143470_ORF2210	CP029509_+_140192-143470_ORF2210 [204-214]	N-terminal extension LdCL_100008600-t42_1-p1 | transcript=LdCL_100008600-t42_1 | gene=LdCL_100008600 | organism=Leishmania_donovani_CL-SL | gene_product=protein transport protein SEC23, putative | transcript_product=protein transport protein SEC23, putative | location=CP029509:141059-143470(+) | protein_length=803 | sequence_SO=chromosome | SO=protein_coding_gene | is_pseudo=false Length=803	LdBPK.10.2.000330.1-p1 | transcript=LdBPK.10.2.000330.1 | gene=LdBPK.10.2.000330 | organism=Leishmania_donovani_strain_LV9 | gene_product=Sec23/Sec24 trunk domain/Sec23/Sec24 beta-sandwich domain/Sec23/Sec24 helical domain/Gelsolin repeat, putative | transcript_product=Sec23/Sec24 trunk domain/Sec23/Sec24 beta-sandwich domain/Sec23/Sec24 helical domain/Gelsolin repeat, putative | location=LdLV9_1…	N-terminal extension	Protein transport protein SEC23
FYWDTNPR	1	CP029509_+_21861-25076_ORF486	CP029509_+_21861-25076_ORF486 [15-22]	N-terminal extension LdCL_100005400-t42_1-p1 | transcript=LdCL_100005400-t42_1 | gene=LdCL_100005400 | organism=Leishmania_donovani_CL-SL | gene_product=Gryzun, putative trafficking through Golgi, putative | transcript_product=Gryzun, putative trafficking through Golgi, putative | location=CP029509:22263-25076(+) | protein_length=937 | sequence_SO=chromosome | SO=protein_coding_gene | is_pseudo=f…	LAEL147_000130900.1-p1 | transcript=LAEL147_000130900.1 | gene=LAEL147_000130900 | organism=Leishmania_aethiopica_L147 | gene_product=Gryzun, putative trafficking through Golgi, putative | transcript_product=Gryzun, putative trafficking through Golgi, putative | location=CM007223.1:20399-23596(+) | protein_length=1065 | sequence_SO=chromosome | SO=protein_coding_gene | is_pseudo=false Length=1065	N-terminal extension	Gryzun
ASMHASPAGPASQPTR	1	CP029510_+_330324-334787_ORF4878	CP029510_+_330324-334787_ORF4878 [66-81]	N-terminal extension LdCL_110014100-t42_1-p1 | transcript=LdCL_110014100-t42_1 | gene=LdCL_110014100 | organism=Leishmania_donovani_CL-SL | gene_product=kinesin, putative | transcript_product=kinesin, putative | location=CP029510:330534-334787(+) | protein_length=1417 | sequence_SO=chromosome | SO=protein_coding_gene | is_pseudo=false Length=1417	LAEL147_000155500.1-p1 | transcript=LAEL147_000155500.1 | gene=LAEL147_000155500 | organism=Leishmania_aethiopica_L147 | gene_product=kinesin, putative | transcript_product=kinesin, putative | location=CM007224.1:331543-335991(+) | protein_length=1482 | sequence_SO=chromosome | SO=protein_coding_gene | is_pseudo=false Length=1482	N-terminal extension	Kinesin
MASHAEGR	1	CP029515_+_437106-437843_ORF6983	CP029515_+_437106-437843_ORF6983 [1-8]	N-terminal extension LdCL_160016800-t42_1-p1 | transcript=LdCL_160016800-t42_1 | gene=LdCL_160016800 | organism=Leishmania_donovani_CL-SL | gene_product=tyrosyl or methionyl-tRNA synthetase-like protein | transcript_product=tyrosyl or methionyl-tRNA synthetase-like protein | location=CP029515:437301-437843(+) | protein_length=180 | sequence_SO=chromosome | SO=protein_coding_gene | is_pseudo=false…	LdBPK.16.2.001170.1-p1 | transcript=LdBPK.16.2.001170.1 | gene=LdBPK.16.2.001170 | organism=Leishmania_donovani_strain_LV9 | gene_product=Putative tRNA binding domain containing protein, putative | transcript_product=Putative tRNA binding domain containing protein, putative | location=LdLV9_16_v1_pilon:447273-447986(+) | protein_length=237 | sequence_SO=chromosome | SO=protein_coding_gene | is_ps…	N-terminal extension	Tyrosyl or methionyl-tRNA synthetase
SSMPTTVLYHGDQLGPRPLVILDHSVAR	1	CP029516_-_325186-326496_ORF4603	CP029516_-_325186-326496_ORF4603 [92-119]	N-terminal extension LdCL_170012900-t42_1-p1 | transcript=LdCL_170012900-t42_1 | gene=LdCL_170012900 | organism=Leishmania_donovani_CL-SL | gene_product=Alpha/beta hydrolase family, putative | transcript_product=Alpha/beta hydrolase family, putative | location=CP029516:325186-326154(-) | protein_length=322 | sequence_SO=chromosome | SO=protein_coding_gene | is_pseudo=false Length=322	LAEL147_000248200.1-p1 | transcript=LAEL147_000248200.1 | gene=LAEL147_000248200 | organism=Leishmania_aethiopica_L147 | gene_product=Alpha/beta hydrolase family, putative | transcript_product=Alpha/beta hydrolase family, putative | location=CM007230.1:283599-284852(-) | protein_length=417 | sequence_SO=chromosome | SO=protein_coding_gene | is_pseudo=false Length=417	N-terminal extension	Alpha/beta hydrolase family
NVPSEPGAHAELSTAELER	5	CP029517_-_143212-144738_ORF2224	CP029517_-_143212-144738_ORF2224 [163-181]	N-terminal extension LdCL_180008400-t42_1-p1 | transcript=LdCL_180008400-t42_1 | gene=LdCL_180008400 | organism=Leishmania_donovani_CL-SL | gene_product=ATP12 chaperone protein, putative | transcript_product=ATP12 chaperone protein, putative | location=CP029517:143212-144126(-) | protein_length=304 | sequence_SO=chromosome | SO=protein_coding_gene | is_pseudo=false Length=304	LGELEM452_180008600.1-p1 | transcript=LGELEM452_180008600.1 | gene=LGELEM452_180008600 | organism=Leishmania_gerbilli_strain_LEM452 | gene_product=ATP12 chaperone protein, putative | transcript_product=ATP12 chaperone protein, putative | location=LgeLEM452_18:150600-151799(-) | protein_length=399 | sequence_SO=chromosome | SO=protein_coding_gene | is_pseudo=false Length=399	N-terminal extension	ATP12 chaperone
FDNSLVAHSGCGGLVALFSPR	1	CP029517_+_449237-452029_ORF7111	CP029517_+_449237-452029_ORF7111 [41-61]	N-terminal extension LdCL_180016000-t42_1-p1 | transcript=LdCL_180016000-t42_1 | gene=LdCL_180016000 | organism=Leishmania_donovani_CL-SL | gene_product=Vacuolar protein sorting-associated protein 16-like, putative | transcript_product=Vacuolar protein sorting-associated protein 16-like, putative | location=CP029517:449534-452029(+) | protein_length=831 | sequence_SO=chromosome | SO=protein_codin…	LAEL147_000268700.1-p1 | transcript=LAEL147_000268700.1 | gene=LAEL147_000268700 | organism=Leishmania_aethiopica_L147 | gene_product=Vacuolar protein sorting-associated protein 16 homolog, putative | transcript_product=Vacuolar protein sorting-associated protein 16 homolog, putative | location=CM007231.1:441430-444213(+) | protein_length=927 | sequence_SO=chromosome | SO=protein_coding_gene | is…	N-terminal extension	Vacuolar protein sorting-associated protein 16
MSAGPKPEPR	1	CP029518_-_3384-4583_ORF65	CP029518_-_3384-4583_ORF65 [1-10]	N-terminal extension LdCL_190005100-t42_1-p1 | transcript=LdCL_190005100-t42_1 | gene=LdCL_190005100 | organism=Leishmania_donovani_CL-SL | gene_product=hypothetical protein | transcript_product=hypothetical protein | location=CP029518:3384-4157(-) | protein_length=257 | sequence_SO=chromosome | SO=protein_coding_gene | is_pseudo=false Length=25	LINF_190005100-T1-p1 | transcript=LINF_190005100-T1 | gene=LINF_190005100 | organism=Leishmania_infantum_JPCM5 | gene_product=hypothetical protein - conserved | transcript_product=hypothetical protein - conserved | location=LinJ.19:3348-4466(-) | protein_length=372 | sequence_SO=chromosome | SO=protein_coding_gene | is_pseudo=false Length=372	N-terminal extension	Hypothetical protein (No domain)
WNANGEALGVVK	2	CP029518_+_123311-125737_ORF2162	CP029518_+_123311-125737_ORF2162 [39-50]	N-terminal extension LdCL_190008300-t42_1-p1 | transcript=LdCL_190008300-t42_1 | gene=LdCL_190008300 | organism=Leishmania_donovani_CL-SL | gene_product=intraflagellar transport protein 80, putative | transcript_product=intraflagellar transport protein 80, putative | location=CP029518:123953-125737(+) | protein_length=594 | sequence_SO=chromosome | SO=protein_coding_gene | is_pseudo=false Length=…	LTRL590_190008000.1-p1 | transcript=LTRL590_190008000.1 | gene=LTRL590_190008000 | organism=Leishmania_tropica_L590 | gene_product=WD domain, G-beta repeat, putative | transcript_product=WD domain, G-beta repeat, putative | location=LtrL590_19:122933-125287(+) | protein_length=784 | sequence_SO=chromosome | SO=protein_coding_gene | is_pseudo=false Length=784	N-terminal extension	Intraflagellar transport protein 80
SSYLEPYDGVYR	2	CP029521_-_198864-200864_ORF2832	CP029521_-_198864-200864_ORF2832 [191-202]	N-terminal extension LdCL_220009900-t42_1-p1 | transcript=LdCL_220009900-t42_1 | gene=LdCL_220009900 | organism=Leishmania_donovani_CL-SL | gene_product=50S ribosome-binding GTPase/Dynamin family, putative | transcript_product=50S ribosome-binding GTPase/Dynamin family, putative | location=CP029521:198864-200198(-) | protein_length=444 | sequence_SO=chromosome | SO=protein_coding_gene | is_pseudo…	LGELEM452_220010000.1-p1 | transcript=LGELEM452_220010000.1 | gene=LGELEM452_220010000 | organism=Leishmania_gerbilli_strain_LEM452 | gene_product=Dynamin family, putative | transcript_product=Dynamin family, putative | location=LgeLEM452_22:177551-179344(-) | protein_length=597 | sequence_SO=chromosome | SO=protein_coding_gene | is_pseudo=false Length=597	N-terminal extension	50S ribosome-binding GTPase/Dynamin family
VSEITSFR	1	CP029522_-_274072-276414_ORF4726	CP029522_-_274072-276414_ORF4726 [84-91]	N-terminal extension LdCL_230013800-t42_1-p1 | transcript=LdCL_230013800-t42_1 | gene=LdCL_230013800 | organism=Leishmania_donovani_CL-SL | gene_product=kinesin, putative | transcript_product=kinesin, putative | location=CP029522:274072-276042(-) | protein_length=656 | sequence_SO=chromosome | SO=protein_coding_gene | is_pseudo=false Length=656	LAEL147_000359800.1-p1 | transcript=LAEL147_000359800.1 | gene=LAEL147_000359800 | organism=Leishmania_aethiopica_L147 | gene_product=kinesin, putative | transcript_product=kinesin, putative | location=CM007236.1:278438-280726(-) | protein_length=762 | sequence_SO=chromosome | SO=protein_coding_gene | is_pseudo=false Length=762	N-terminal extension	Kinesin
GVDEIEKPLICHFFR	1	CP029523_-_729036-731420_ORF12336	CP029523_-_729036-731420_ORF12336 [48-62]	N-terminal extension LdCL_240025300-t42_1-p1 | transcript=LdCL_240025300-t42_1 | gene=LdCL_240025300 | organism=Leishmania_donovani_CL-SL | gene_product=cyclin 10 | transcript_product=cyclin 10 | location=CP029523:729036-731012(-) | protein_length=658 | sequence_SO=chromosome | SO=protein_coding_gene | is_pseudo=false Length=658	LAEL147_000394600.1-p1 | transcript=LAEL147_000394600.1 | gene=LAEL147_000394600 | organism=Leishmania_aethiopica_L147 | gene_product=cyclin 10 | transcript_product=cyclin 10 | location=CM007237.1:706886-709039(-) | protein_length=717 | sequence_SO=chromosome | SO=protein_coding_gene | is_pseudo=false Length=717	N-terminal extension	Cyclin 10
TSLQHCQTELR	2	CP029524_-_659239-659658_ORF10032	CP029524_-_659239-659658_ORF10032 [89-99]	Novel gene example	LdBPK.25.2.001710.1-p1 | transcript=LdBPK.25.2.001710.1 | gene=LdBPK.25.2.001710 | organism=Leishmania_donovani_strain_LV9 | gene_product=hypothetical protein, conserved | transcript_product=hypothetical protein, conserved | location=LdLV9_25_v1_pilon:658046-658408(-) | protein_length=120 | sequence_SO=chromosome | SO=protein_coding_gene | is_pseudo=false Length=120	N-terminal extension	Hypothetical protein (Signal peptide)
IVTSFINGFFQR	1	CP029528_-_359143-360588_ORF5305	CP029528_-_359143-360588_ORF5305 [118-129]	N-terminal extension LdCL_290015000-t42_1-p1 | transcript=LdCL_290015000-t42_1 | gene=LdCL_290015000 | organism=Leishmania_donovani_CL-SL | gene_product=IPP transferase/Zinc-finger of C2H2 type, putative | transcript_product=IPP transferase/Zinc-finger of C2H2 type, putative | location=CP029528:359143-359790(-) | protein_length=215 | sequence_SO=chromosome | SO=protein_coding_gene | is_pseudo=fal…	LAEL147_000524600.1-p1 | transcript=LAEL147_000524600.1 | gene=LAEL147_000524600 | organism=Leishmania_aethiopica_L147 | gene_product=IPP transferase/Zinc-finger of C2H2 type, putative | transcript_product=IPP transferase/Zinc-finger of C2H2 type, putative | location=CM007242.1:347856-349211(+) | protein_length=451 | sequence_SO=chromosome | SO=protein_coding_gene | is_pseudo=false Length=451	N-terminal extension	IPP transferase/Zinc-finger of C2H2 type
EASASAQTLAVRPPPSAVSLAFGSSGQR	2	CP029529_-_189738-192296_ORF2792	CP029529_-_189738-192296_ORF2792 [43-70]	N-terminal extension LdCL_300011200-t42_1-p1 | transcript=LdCL_300011200-t42_1 | gene=LdCL_300011200 | organism=Leishmania_donovani_CL-SL | gene_product=Ciliary BBSome complex subunit 2, N-terminal/Ciliary BBSome complex subunit 2, middle region/Ciliary BBSome complex subunit 2, C-terminal, putative | transcript_product=Ciliary BBSome complex subunit 2, N-terminal/Ciliary BBSome complex subunit 2…	LdBPK_300610.1.1-p1 | transcript=LdBPK_300610.1.1 | gene=LdBPK_300610.1 | organism=Leishmania_donovani_BPK282A1 | gene_product=Bardet-Biedl syndrome 2 protein | transcript_product=Bardet-Biedl syndrome 2 protein | location=Ld30_v01s1:189992-192487(-) | protein_length=831 | sequence_SO=chromosome | SO=protein_coding_gene | is_pseudo=false Length=831	N-terminal extension	Ciliary BBSome complex subunit 2
GQFNPIHAFTEHSISPAK	9	CP029532_+_1061790-1064060_ORF16791	CP029532_+_1061790-1064060_ORF16791 [38-55]	N-terminal extension LdCL_330033500-t42_1-p1 | transcript=LdCL_330033500-t42_1 | gene=LdCL_330033500 | organism=Leishmania_donovani_CL-SL | gene_product=mitochondrial RNA binding complex 1 subunit | transcript_product=mitochondrial RNA binding complex 1 subunit | location=CP029532:1062027-1064060(+) | protein_length=677 | sequence_SO=chromosome | SO=protein_coding_gene | is_pseudo=false Length=677	LGELEM452_330034400.1-p1 | transcript=LGELEM452_330034400.1 | gene=LGELEM452_330034400 | organism=Leishmania_gerbilli_strain_LEM452 | gene_product=mitochondrial RNA binding complex 1 subunit, putative | transcript_product=mitochondrial RNA binding complex 1 subunit, putative | location=LgeLEM452_33:1007877-1010105(+) | protein_length=742 | sequence_SO=chromosome | SO=protein_coding_gene | is_pseu…	N-terminal extension	Mitochondrial RNA binding complex 1 subunit
LCGHQFDAPGQFDDPNASSTTILAELR	2	CP029532_+_223759-225072_ORF3958	CP029532_+_223759-225072_ORF3958 [88-114]	N-terminal extension LdCL_330012200-t42_1-p1 | transcript=LdCL_330012200-t42_1 | gene=LdCL_330012200 | organism=Leishmania_donovani_CL-SL | gene_product=intraflagellar transport protein 57/55, putative | transcript_product=intraflagellar transport protein 57/55, putative | location=CP029532:224164-225072(+) | protein_length=302 | sequence_SO=chromosome | SO=protein_coding_gene | is_pseudo=false L…	LAEL147_000671600.1-p1 | transcript=LAEL147_000671600.1 | gene=LAEL147_000671600 | organism=Leishmania_aethiopica_L147 | gene_product=Intra-flagellar transport protein 57, putative | transcript_product=Intra-flagellar transport protein 57, putative | location=CM007210.1:202085-203338(+) | protein_length=417 | sequence_SO=chromosome | SO=protein_coding_gene | is_pseudo=false Length=417	N-terminal extension	intraflagellar transport protein 57/55
RDPTEFLR	1	CP029532_+_489167-490330_ORF7924	CP029532_+_489167-490330_ORF7924 [7-14]	N-terminal extension LdCL_330018900-t42_1-p1 | transcript=LdCL_330018900-t42_1 | gene=LdCL_330018900 | organism=Leishmania_donovani_CL-SL | gene_product=hypothetical protein | transcript_product=hypothetical protein | location=CP029532:489290-490330(+) | protein_length=346 | sequence_SO=chromosome | SO=protein_coding_gene | is_pseudo=false Length=346	LGELEM452_330018800.1-p1 | transcript=LGELEM452_330018800.1 | gene=LGELEM452_330018800 | organism=Leishmania_gerbilli_strain_LEM452 | gene_product=pentatricopeptide repeat domain containing protein, putative | transcript_product=pentatricopeptide repeat domain containing protein, putative | location=LgeLEM452_33:440639-441733(+) | protein_length=364 | sequence_SO=chromosome | SO=protein_coding_ge…	N-terminal extension	Hypothetical protein (No domain)
IWAEMMQTLR	1	CP029533_-_582191-584158_ORF10072	CP029533_-_582191-584158_ORF10072 [31-40]	N-terminal extension LdCL_340019400-t42_1-p1 | transcript=LdCL_340019400-t42_1 | gene=LdCL_340019400 | organism=Leishmania_donovani_CL-SL | gene_product=3'-5' exonuclease, putative | transcript_product=3'-5' exonuclease, putative | location=CP029533:582191-583837(-) | protein_length=548 | sequence_SO=chromosome | SO=protein_coding_gene | is_pseudo=false Length=548	LGELEM452_340014400.1-p1 | transcript=LGELEM452_340014400.1 | gene=LGELEM452_340014400 | organism=Leishmania_gerbilli_strain_LEM452 | gene_product=3'-5' exonuclease, putative | transcript_product=3'-5' exonuclease, putative | location=LgeLEM452_34:384961-386679(-) | protein_length=572 | sequence_SO=chromosome | SO=protein_coding_gene | is_pseudo=false Length=572	N-terminal extension	3'-5' exonuclease
LFSRPDLAVVAVR	4	CP029534_-_1340868-1342346_ORF22803	CP029534_-_1340868-1342346_ORF22803 [89-101]	N-terminal extension LdCL_350040100-t42_1-p1 | transcript=LdCL_350040100-t42_1 | gene=LdCL_350040100 | organism=Leishmania_donovani_CL-SL | gene_product=Peroxidase, putative | transcript_product=Peroxidase, putative | location=CP029534:1340868-1341977(-) | protein_length=369 | sequence_SO=chromosome | SO=protein_coding_gene | is_pseudo=false Length=369	LmjF.35.3460:mRNA-p1 | transcript=LmjF.35.3460:mRNA | gene=LmjF.35.3460 | organism=Leishmania_major_strain_Friedlin | gene_product=peroxidase, putative | transcript_product=peroxidase, putative | location=LmjF.35:1401048-1402460(-) | protein_length=470 | sequence_SO=chromosome | SO=protein_coding_gene | is_pseudo=false Length=470	N-terminal extension	Peroxidase
VCDACYLALR	2	CP029534_-_1353746-1354663_ORF23010	CP029534_-_1353746-1354663_ORF23010 [64-73]	N-terminal extension LdCL_350040500-t42_1-p1 | transcript=LdCL_350040500-t42_1 | gene=LdCL_350040500 | organism=Leishmania_donovani_CL-SL | gene_product=zinc finger protein, putative | transcript_product=zinc finger protein, putative | location=CP029534:1353746-1354384(-) | protein_length=212 | sequence_SO=chromosome | SO=protein_coding_gene | is_pseudo=false Length=212	LINF_350040400-T1-p1 | transcript=LINF_350040400-T1 | gene=LINF_350040400 | organism=Leishmania_infantum_JPCM5 | gene_product=zinc finger protein - putative | transcript_product=zinc finger protein - putative | location=LinJ.35:1337635-1338531(-) | protein_length=298 | sequence_SO=chromosome | SO=protein_coding_gene | is_pseudo=false Length=298	N-terminal extension	Zinc finger protein
DDDGEGRADDEFVTTPQVADESEMANR	1	CP029535_-_2394974-2396395_ORF40624	CP029535_-_2394974-2396395_ORF40624 [17-43]	N-terminal extension LdCL_360071700-t42_1-p1 | transcript=LdCL_360071700-t42_1 | gene=LdCL_360071700 | organism=Leishmania_donovani_CL-SL | gene_product=hypothetical protein | transcript_product=hypothetical protein | location=CP029535:2394974-2395945(-) | protein_length=323 | sequence_SO=chromosome | SO=protein_coding_gene | is_pseudo=false Length=323	LGELEM452_360072700.1-p1 | transcript=LGELEM452_360072700.1 | gene=LGELEM452_360072700 | organism=Leishmania_gerbilli_strain_LEM452 | gene_product=hypothetical protein, conserved | transcript_product=hypothetical protein, conserved | location=LgeLEM452_36:2328736-2329959(-) | protein_length=407 | sequence_SO=chromosome | SO=protein_coding_gene | is_pseudo=false Length=407	N-terminal extension	Hypothetical protein (Ran-binding domain (RanBD domain))
QTAVNENMHRPSR	2	CP029519_-_693767-694969_ORF11556	CP029519_-_693767-694969_ORF11556 [193-205]	N-terminal extension LdCL_200021000-t42_1-p1 | transcript=LdCL_200021000-t42_1 | gene=LdCL_200021000 | organism=Leishmania_donovani_CL-SL | gene_product=40S ribosomal protein S11, putative | transcript_product=40S ribosomal protein S11, putative | location=CP029519:693767-694192(-) | protein_length=141 | sequence_SO=chromosome | SO=protein_coding_gene | is_pseudo=false Length=141	LMJSD75_210023800.1-p1 | transcript=LMJSD75_210023800.1 | gene=LMJSD75_210023800 | organism=Leishmania_major_strain_SD_75.1 | gene_product=40S ribosomal protein S11, putative | transcript_product=40S ribosomal protein S11, putative | location=JH605109:625831-626352(-) | protein_length=173 | sequence_SO=supercontig | SO=protein_coding_gene | is_pseudo=false Length=173	N-terminal extension	40S ribosomal protein S11
IMPLEVGDNAVVSNSQATHGNLFHFR	2	CP029522_+_583582-584928_ORF9621	CP029522_+_583582-584928_ORF9621 [62-87]	N-terminal extension LdCL_230021200-t42_1-p1 | transcript=LdCL_230021200-t42_1 | gene=LdCL_230021200 | organism=Leishmania_donovani_CL-SL | gene_product=hypothetical protein | transcript_product=hypothetical protein | location=CP029522:583873-584928(+) | protein_length=351 | sequence_SO=chromosome | SO=protein_coding_gene | is_pseudo=false Length=351	LmjF.23.1190:mRNA-p1 | transcript=LmjF.23.1190:mRNA | gene=LmjF.23.1190 | organism=Leishmania_major_strain_Friedlin | gene_product=hypothetical protein, conserved | transcript_product=hypothetical protein, conserved | location=LmjF.23:558544-559869(+) | protein_length=441 | sequence_SO=chromosome | SO=protein_coding_gene | is_pseudo=false Length=441	N-terminal extension	Hypothetical protein (No domain)
IMPLEVGDNAVVSNSQATHGNLFHFR	1	CP029522_+_583582-584928_ORF9621	CP029522_+_583582-584928_ORF9621 [62-87]
EYPMYPGEYVPAGHNTLSSLR	2	CP029522_+_583582-584928_ORF9621	CP029522_+_583582-584928_ORF9621 [88-108]
