# Supplementary material for: Identification of new protein-coding potential in Leishmania donovani using a proteogenomics approach
Source: Research Square preprint supplement (doi:10.21203/rs.3.rs-8719077/v1), 2026-02-13
Supplement: Supplementary file 3 [file 44fa8b8804315094ec93b031.xlsx]

## Sheet: Sheet1
Chowdhury et al. (2025). Identification of new protein-coding potential in Leishmania donovani using a proteogenomics approach Supplementary Table 3: Novel protein-coding genes in amastigote stages of Leishmania donovani
Note: Peptide-level evidence for these proteins is visualised in Supplementary Figure 3.
Peptide sequence	# PSMs	Master Protein Accessions	Positions in Master Proteins	L. donovani orthologs	Other Leishmania species orthologs	Category	Description (Domain structure)
EPMGHEETTFSR	1	CP029503_-_461522-462052_ORF6515	CP029503_-_461522-462052_ORF6515 [16-27]	Novel gene in L. donovani CL_SL	LTRL590_040017200.1-p1 | transcript=LTRL590_040017200.1 | gene=LTRL590_040017200 | organism=Leishmania_tropica_L590 | gene_product=hypothetical protein | transcript_product=hypothetical protein | location=LtrL590_04:466351-466611(-) | protein_length=86 | sequence_SO=chromosome | SO=protein_coding_gene | is_pseudo=false Length=86	Novel	Transmembrane region
EPMGHEETTFSR	1	CP029503_-_461522-462052_ORF6515	CP029503_-_461522-462052_ORF6515 [16-27]
KDDDGFLDVEDLR	1	CP029505_-_29857-30405_ORF466	CP029505_-_29857-30405_ORF466 [142-154]	Novel gene in L. donovani CL_SL	LTULEM423_060005500.1-p1 | transcript=LTULEM423_060005500.1 | gene=LTULEM423_060005500 | organism=Leishmania_turanica_strain_LEM423 | gene_product=hypothetical protein, conserved | transcript_product=hypothetical protein, conserved | location=LtuLEM423_06:28432-29811(-) | protein_length=459 | sequence_SO=chromosome | SO=protein_coding_gene | is_pseudo=false	Novel	No domain
LLDLPTK	1	CP029517_-_505657-508212_ORF8375	CP029517_-_505657-508212_ORF8375 [502-508]	Novel gene in L. donovani CL_SL	GET87835.1 | transcript=LtaPh_1811901_t1 | gene=LtaPh_1811901 | organism=Leishmania_tarentolae_Parrot_Tar_II_2019 | gene_product=unspecified product | transcript_product=unspecified product | location=BLBS01000023:523764-525896(-) | protein_length=710 | sequence_SO=supercontig | SO=protein_coding_gene | is_pseudo=false Length=710	Novel	No domain
MFLGGFVPR	2	CP029526_+_668443-668685_ORF10738	CP029526_+_668443-668685_ORF10738 [1-9]	Novel gene in L. donovani CL_SL	LGELEM452_270022800.1-p1 | transcript=LGELEM452_270022800.1 | gene=LGELEM452_270022800 | organism=Leishmania_gerbilli_strain_LEM452 | gene_product=hypothetical protein | transcript_product=hypothetical protein | location=LgeLEM452_27:640019-640207(+) | protein_length=62 | sequence_SO=chromosome | SO=protein_coding_gene | is_pseudo=false Length=62	Novel	No domain
MFLGGFVPR	4	CP029526_+_668443-668685_ORF10738	CP029526_+_668443-668685_ORF10738 [1-9]
DLVLDPHR	8	CP029526_+_668443-668685_ORF10738	CP029526_+_668443-668685_ORF10738 [45-52]
MFLGGFVPR	4	CP029526_+_668443-668685_ORF10738	CP029526_+_668443-668685_ORF10738 [1-9]
MFLGGFVPR	4	CP029526_+_668443-668685_ORF10738	CP029526_+_668443-668685_ORF10738 [1-9]
ATLDVALGLQLVR	1	CP029529_+_1077715-1078767_ORF17849	CP029529_+_1077715-1078767_ORF17849 [50-62]	Novel gene in L. donovani CL_SL	GET90904.1 | transcript=LtaPh_3029641_t1 | gene=LtaPh_3029641 | organism=Leishmania_tarentolae_Parrot_Tar_II_2019 | gene_product=Glyceraldehyde 3-phosphate dehydrogenase, glycosomal [Source:UniProtKB/TrEMBL;Acc:A0A640KPE9] | transcript_product=Glyceraldehyde 3-phosphate dehydrogenase, glycosomal [Source:UniProtKB/TrEMBL;Acc:A0A640KPE9] | location=BLBS01000043:881518-882780(+) | protein_length=420…	Novel	No domain
MSHLFENAAIELLR	1	CP029530_-_1007276-1007560_ORF14736	CP029530_-_1007276-1007560_ORF14736 [1-14]	Novel gene in L. donovani CL_SL	LMJLV39_310028100.1-p1 | transcript=LMJLV39_310028100.1 | gene=LMJLV39_310028100 | organism=Leishmania_major_strain_LV39c5 | gene_product=tryparedoxin 4, putative | transcript_product=tryparedoxin 4, putative | location=LmjLV39_31:932209-932751(-) | protein_length=180 | sequence_SO=chromosome | SO=protein_coding_gene | is_pseudo=false Length=180	Novel	No domain
FTYALAK	3	CP029531_+_1405961-1406455_ORF23552	CP029531_+_1405961-1406455_ORF23552 [16-22]	Novel gene in L. donovani CL_SL	LMJSD75_320042700.1-p1 | transcript=LMJSD75_320042700.1 | gene=LMJSD75_320042700 | organism=Leishmania_major_strain_SD_75.1 | gene_product=hypothetical protein | transcript_product=hypothetical protein | location=JH605119:1384790-1385059(+) | protein_length=89 | sequence_SO=supercontig | SO=protein_coding_gene | is_pseudo=false Length=89	Novel	Ribosomes are the particles that catalyse mRNA-directed protein (S36_mt domain)
FTYALAK	3	CP029531_+_1405961-1406455_ORF23552	CP029531_+_1405961-1406455_ORF23552 [16-22]
IVGGTYPTPPAR	4	CP029534_+_445757-446188_ORF6321	CP029534_+_445757-446188_ORF6321 [17-28]	Novel gene in L. donovani CL_SL	LdBPK_351130.1.1-p1 | transcript=LdBPK_351130.1.1 | gene=LdBPK_351130.1 | organism=Leishmania_donovani_BPK282A1 | gene_product=Selenoprotein T, putative | transcript_product=Selenoprotein T, putative | location=Ld35_v01s1:494836-495942(+) | protein_length=368 | sequence_SO=chromosome | SO=protein_coding_gene | is_pseudo=false Length=368	Novel	No domain
IVGGTYPTPPAR	3	CP029534_+_445757-446188_ORF6321	CP029534_+_445757-446188_ORF6321 [17-28]
LQAGAVPTVAEIR	1	CP029534_+_445757-446188_ORF6321	CP029534_+_445757-446188_ORF6321 [103-115]
