# Supplementary material for: Identification of new protein-coding potential in Leishmania donovani using a proteogenomics approach
Source: Research Square preprint supplement (doi:10.21203/rs.3.rs-8719077/v1), 2026-02-13
Supplement: Supplementary file 4 [file 874954161d003829bace7785.xlsx]

## Sheet: Sheet1
Chowdhury et al. (2025). Identification of N-terminal extensions in Leishmania donovani using a proteogenomics approach Supplementary Table 4: N-terminal extensions in amastigote stages of Leishmania donovani
Note: Peptide-level evidence for these proteins is visualised in Supplementary Figure 4.
Peptide sequence	# PSMs	Master Protein Accessions	Positions in Master Proteins	L. donovani orthologs	Other Leishmania species orthologs	Category	Description (Domain structure)
LEATTSDCVSSVR	1	CP029500_+_82716-83804_ORF1353	CP029500_+_82716-83804_ORF1353 [13-25]	N-terminal extension LdCL_010008300-t42_1-p1 | transcript=LdCL_010008300-t42_1 | gene=LdCL_010008300 | organism=Leishmania_donovani_CL-SL | gene_product=poly(A) export protein, putative | transcript_product=poly(A) export protein, putative | location=CP029500:82881-83804(+) | protein_length=307 | sequence_SO=chromosome | SO=protein_coding_gene | is_pseudo=false Length=307	LAMAPH8_000008200.1-p1 | transcript=LAMAPH8_000008200.1 | gene=LAMAPH8_000008200 | organism=Leishmania_amazonensis_strain_PH8 | gene_product=WD domain, G-beta repeat, putative | transcript_product=WD domain, G-beta repeat, putative | location=CM046895.1:75985-77004(+) | protein_length=339 | sequence_SO=chromosome | SO=protein_coding_gene | is_pseudo=false Length=339	N-terminal extension	poly(A) export protein
LEATTSDCVSSVR	2	CP029500_+_82716-83804_ORF1353	CP029500_+_82716-83804_ORF1353 [13-25]
GITELAPLR	1	CP029503_+_43542-44555_ORF764	CP029503_+_43542-44555_ORF764 [13-21]	N-terminal extension LdCL_040006400-t42_1-p1 | transcript=LdCL_040006400-t42_1 | gene=LdCL_040006400 | organism=Leishmania_donovani_CL-SL | gene_product=exosome complex exonuclease RRP40, putative | transcript_product=exosome complex exonuclease RRP40, putative | location=CP029503:43653-44555(+) | protein_length=300 | sequence_SO=chromosome | SO=protein_coding_gene | is_pseudo=false Length=300	LmxM.04.0120.1-p1 | transcript=LmxM.04.0120.1 | gene=LmxM.04.0120 | organism=Leishmania_mexicana_MHOM/GT/2001/U1103 | gene_product=exosome complex exonuclease RRP40, putative | transcript_product=exosome complex exonuclease RRP40, putative | location=LmxM.04:42960-43958(+) | protein_length=332 | sequence_SO=chromosome | SO=protein_coding_gene | is_pseudo=false Length=332	N-terminal extension	exosome complex exonuclease RRP40
FTPASAAAAALNHLK	2	CP029507_+_20277-22976_ORF377	CP029507_+_20277-22976_ORF377 [112-126]	N-terminal extension LdCL_080005700-t42_1-p1 | transcript=LdCL_080005700-t42_1 | gene=LdCL_080005700 | organism=Leishmania_donovani_CL-SL | gene_product=ATP-dependent DEAD/H RNA helicase, putative | transcript_product=ATP-dependent DEAD/H RNA helicase, putative | location=CP029507:20919-22976(+) | protein_length=685 | sequence_SO=chromosome | SO=protein_coding_gene | is_pseudo=false Length=685	LAEL147_000101700.1-p1 | transcript=LAEL147_000101700.1 | gene=LAEL147_000101700 | organism=Leishmania_aethiopica_L147 | gene_product=ATP-dependent DEAD/H RNA helicase, putative | transcript_product=ATP-dependent DEAD/H RNA helicase, putative | location=CM007221.1:19688-22288(+) | protein_length=866 | sequence_SO=chromosome | SO=protein_coding_gene | is_pseudo=false Length=866	N-terminal extension	ATP-dependent DEAD/H RNA helicase
SPAGQFVNVVPEGMQPR	1	CP029507_+_228768-229598_ORF3085	CP029507_+_228768-229598_ORF3085 [27-43]	N-terminal extension LdCL_080010700-t42_1-p1 | transcript=LdCL_080010700-t42_1 | gene=LdCL_080010700 | organism=Leishmania_donovani_CL-SL | gene_product=hypothetical protein | transcript_product=hypothetical protein | location=CP029507:228885-229598(+) | protein_length=237 | sequence_SO=chromosome | SO=protein_coding_gene | is_pseudo=false Length=237	LARLEM1108_080010000.1-p1 | transcript=LARLEM1108_080010000.1 | gene=LARLEM1108_080010000 | organism=Leishmania_arabica_strain_LEM1108 | gene_product=hypothetical protein, conserved | transcript_product=hypothetical protein, conserved | location=LarLEM1108_08:198217-199047(+) | protein_length=276 | sequence_SO=chromosome | SO=protein_coding_gene | is_pseudo=false Length=276	N-terminal extension	Hypothetical protein (No domain)
SPAGQFVNVVPEGMQPR	1	CP029507_+_228768-229598_ORF3085	CP029507_+_228768-229598_ORF3085 [27-43]
HLSPGELALPQHPR	2	CP029507_+_481465-483264_ORF6674	CP029507_+_481465-483264_ORF6674 [85-98]	N-terminal extension LdCL_080016400-t42_1-p1 | transcript=LdCL_080016400-t42_1 | gene=LdCL_080016400 | organism=Leishmania_donovani_CL-SL | gene_product=guide RNA binding protein, putative | transcript_product=guide RNA binding protein, putative | location=CP029507:481936-483264(+) | protein_length=442 | sequence_SO=chromosome | SO=protein_coding_gene | is_pseudo=false Length=442	LTRL590_080015100.1-p1 | transcript=LTRL590_080015100.1 | gene=LTRL590_080015100 | organism=Leishmania_tropica_L590 | gene_product=MRB1-associated protein, putative | transcript_product=MRB1-associated protein, putative | location=LtrL590_08:399761-401428(+) | protein_length=555 | sequence_SO=chromosome | SO=protein_coding_gene | is_pseudo=false Length=555	N-terminal extension	guide RNA binding protein
NIATEALQMK	3	CP029507_+_481465-483264_ORF6674	CP029507_+_481465-483264_ORF6674 [106-115]
NIATEALQMK	1	CP029507_+_481465-483264_ORF6674	CP029507_+_481465-483264_ORF6674 [106-115]
DLIIDVLHHAATGGSVPVSEK	1	CP029508_+_16695-20693_ORF326	CP029508_+_16695-20693_ORF326 [41-61]	N-terminal extension LdCL_090005800-t42_1-p1 | transcript=LdCL_090005800-t42_1 | gene=LdCL_090005800 | organism=Leishmania_donovani_CL-SL | gene_product=RNA helicase, putative | transcript_product=RNA helicase, putative | location=CP029508:16989-20693(+) | protein_length=1234 | sequence_SO=chromosome | SO=protein_coding_gene | is_pseudo=false Length=1234	LdBPK_090090.1.1-p1 | transcript=LdBPK_090090.1.1 | gene=LdBPK_090090.1 | organism=Leishmania_donovani_BPK282A1 | gene_product=RNA helicase, putative | transcript_product=RNA helicase, putative | location=Ld09_v01s1:21950-25891(+) | protein_length=1313 | sequence_SO=chromosome | SO=protein_coding_gene | is_pseudo=false Length=1313	N-terminal extension	RNA helicase
HSTAPPLVDFGDSPSFSR	1	CP029509_+_67220-69637_ORF1223	CP029509_+_67220-69637_ORF1223 [160-177]	N-terminal extension LdCL_100006600-t42_1-p1 | transcript=LdCL_100006600-t42_1 | gene=LdCL_100006600 | organism=Leishmania_donovani_CL-SL | gene_product=hypothetical protein | transcript_product=hypothetical protein | location=CP029509:68120-69637(+) | protein_length=505 | sequence_SO=chromosome | SO=protein_coding_gene | is_pseudo=false Length=505	LAEL147_000132100.1-p1 | transcript=LAEL147_000132100.1 | gene=LAEL147_000132100 | organism=Leishmania_aethiopica_L147 | gene_product=hypothetical protein, conserved | transcript_product=hypothetical protein, conserved | location=CM007223.1:65699-67840(+) | protein_length=713 | sequence_SO=chromosome | SO=protein_coding_gene | is_pseudo=false Length=713	N-terminal extension	Hypothetical protein (No domain)
QADQTWLPVSDLYAALPSHVR	1	CP029510_+_138994-143037_ORF1973	CP029510_+_138994-143037_ORF1973 [561-581]	LdCL_110009200-t42_1-p1 | transcript=LdCL_110009200-t42_1 | gene=LdCL_110009200 | organism=Leishmania_donovani_CL-SL | gene_product=hypothetical protein | transcript_product=hypothetical protein | location=CP029510:141103-143037(+) | protein_length=644 | sequence_SO=chromosome | SO=protein_coding_gene | is_pseudo=false Length=644	LmjF.11.0430:mRNA-p1 | transcript=LmjF.11.0430:mRNA | gene=LmjF.11.0430 | organism=Leishmania_major_strain_Friedlin | gene_product=hypothetical protein, conserved | transcript_product=hypothetical protein, conserved | location=LmjF.11:139719-142277(+) | protein_length=852 | sequence_SO=chromosome | SO=protein_coding_gene | is_pseudo=false Length=852	N-terminal extension	Hypothetical protein (No domain)
GGAPPLGSPMDTLFK	1	CP029513_+_81273-82364_ORF1217	CP029513_+_81273-82364_ORF1217 [35-49]	LdCL_140007900-t42_1-p1 | transcript=LdCL_140007900-t42_1 | gene=LdCL_140007900 | organism=Leishmania_donovani_CL-SL | gene_product=hypothetical protein | transcript_product=hypothetical protein | location=CP029513:81522-82364(+) | protein_length=280 | sequence_SO=chromosome | SO=protein_coding_gene | is_pseudo=false Length=280	> LAEL147_000193000.1-p1 | transcript=LAEL147_000193000.1 | gene=LAEL147_000193000 | organism=Leishmania_aethiopica_L147 | gene_product=NAD dependent epimerase/dehydratase family, putative | transcript_product=NAD dependent epimerase/dehydratase family, putative | location=CM007227.1:92436-93428(+) | protein_length=330 | sequence_SO=chromosome | SO=protein_coding_gene | is_pseudo=false Length=330	N-terminal extension	Hypothetical protein (No domain)
GGAASTGTENATAMSR	6	CP029515_+_437106-437843_ORF6983	CP029515_+_437106-437843_ORF6983 [45-60]	LdCL_160016800-t42_1-p1 | transcript=LdCL_160016800-t42_1 | gene=LdCL_160016800 | organism=Leishmania_donovani_CL-SL | gene_product=tyrosyl or methionyl-tRNA synthetase-like protein | transcript_product=tyrosyl or methionyl-tRNA synthetase-like protein | location=CP029515:437301-437843(+) | protein_length=180 | sequence_SO=chromosome | SO=protein_coding_gene | is_pseudo=false Length=180	LdBPK.16.2.001170.1-p1 | transcript=LdBPK.16.2.001170.1 | gene=LdBPK.16.2.001170 | organism=Leishmania_donovani_strain_LV9 | gene_product=Putative tRNA binding domain containing protein, putative | transcript_product=Putative tRNA binding domain containing protein, putative | location=LdLV9_16_v1_pilon:447273-447986(+) | protein_length=237 | sequence_SO=chromosome | SO=protein_coding_gene | is_ps…	N-terminal extension	Tyrosyl or methionyl-tRNA synthetase
NVPSEPGAHAELSTAELER	6	CP029517_-_143212-144738_ORF2224	CP029517_-_143212-144738_ORF2224 [163-181]	LdCL_180008400-t42_1-p1 | transcript=LdCL_180008400-t42_1 | gene=LdCL_180008400 | organism=Leishmania_donovani_CL-SL | gene_product=ATP12 chaperone protein, putative | transcript_product=ATP12 chaperone protein, putative | location=CP029517:143212-144126(-) | protein_length=304 | sequence_SO=chromosome | SO=protein_coding_gene | is_pseudo=false Length=304	LdBPK_180350.1.1-p1 | transcript=LdBPK_180350.1.1 | gene=LdBPK_180350.1 | organism=Leishmania_donovani_BPK282A1 | gene_product=ATP12 chaperone protein, putative | transcript_product=ATP12 chaperone protein, putative | location=Ld18_v01s1:145811-147010(-) | protein_length=399 | sequence_SO=chromosome | SO=protein_coding_gene | is_pseudo=false Length=399	N-terminal extension	ATP12 chaperone
LDASALLK	4	CP029517_-_143212-144738_ORF2224	CP029517_-_143212-144738_ORF2224 [155-162]
VWSQAGIPR	1	CP029518_+_123311-125737_ORF2162	CP029518_+_123311-125737_ORF2162 [139-147]	LdCL_190008300-t42_1-p1 | transcript=LdCL_190008300-t42_1 | gene=LdCL_190008300 | organism=Leishmania_donovani_CL-SL | gene_product=intraflagellar transport protein 80, putative | transcript_product=intraflagellar transport protein 80, putative | location=CP029518:123953-125737(+) | protein_length=594 | sequence_SO=chromosome | SO=protein_coding_gene | is_pseudo=false Length=594	LTRL590_190008000.1-p1 | transcript=LTRL590_190008000.1 | gene=LTRL590_190008000 | organism=Leishmania_tropica_L590 | gene_product=WD domain, G-beta repeat, putative | transcript_product=WD domain, G-beta repeat, putative | location=LtrL590_19:122933-125287(+) | protein_length=784 | sequence_SO=chromosome | SO=protein_coding_gene | is_pseudo=false Length=784	N-terminal extension	intraflagellar transport protein 80
TNDGGIPNATGMDNAPGLYAEKPSSTYCEEK	2	CP029518_+_68441-70540_ORF1334	CP029518_+_68441-70540_ORF1334 [28-58]	LdCL_190007200-t42_1-p1 | transcript=LdCL_190007200-t42_1 | gene=LdCL_190007200 | organism=Leishmania_donovani_CL-SL | gene_product=Complex 1 protein (LYR family)/Complex1 LYR-like, putative | transcript_product=Complex 1 protein (LYR family)/Complex1 LYR-like, putative | location=CP029518:68579-70540(+) | protein_length=653 | sequence_SO=chromosome | SO=protein_coding_gene | is_pseudo=false Leng…	LTRL590_190006800.1-p1 | transcript=LTRL590_190006800.1 | gene=LTRL590_190006800 | organism=Leishmania_tropica_L590 | gene_product=Complex 1 protein (LYR family), putative | transcript_product=Complex 1 protein (LYR family), putative | location=LtrL590_19:67494-69569(+) | protein_length=691 | sequence_SO=chromosome | SO=protein_coding_gene | is_pseudo=false Length=691	N-terminal extension	Complex 1 protein (LYR family)/Complex1 LYR
TNDGGIPNATGMDNAPGLYAEKPSSTYCEEK	4	CP029518_+_68441-70540_ORF1334	CP029518_+_68441-70540_ORF1334 [28-58]
QTAVNENMHRPSR	2	CP029519_-_693767-694969_ORF11556	CP029519_-_693767-694969_ORF11556 [193-205]	LdCL_200021000-t42_1-p1 | transcript=LdCL_200021000-t42_1 | gene=LdCL_200021000 | organism=Leishmania_donovani_CL-SL | gene_product=40S ribosomal protein S11, putative | transcript_product=40S ribosomal protein S11, putative | location=CP029519:693767-694192(-) | protein_length=141 | sequence_SO=chromosome | SO=protein_coding_gene | is_pseudo=false Length=141	LMJSD75_210023800.1-p1 | transcript=LMJSD75_210023800.1 | gene=LMJSD75_210023800 | organism=Leishmania_major_strain_SD_75.1 | gene_product=40S ribosomal protein S11, putative | transcript_product=40S ribosomal protein S11, putative | location=JH605109:625831-626352(-) | protein_length=173 | sequence_SO=supercontig | SO=protein_coding_gene | is_pseudo=false Length=173	N-terminal extension	40S ribosomal protein S11
SSYLEPYDGVYR	1	CP029521_-_198864-200864_ORF2832	CP029521_-_198864-200864_ORF2832 [191-202]	LdCL_220009900-t42_1-p1 | transcript=LdCL_220009900-t42_1 | gene=LdCL_220009900 | organism=Leishmania_donovani_CL-SL | gene_product=50S ribosome-binding GTPase/Dynamin family, putative | transcript_product=50S ribosome-binding GTPase/Dynamin family, putative | location=CP029521:198864-200198(-) | protein_length=444 | sequence_SO=chromosome | SO=protein_coding_gene | is_pseudo=false Length=444	LGELEM452_220010000.1-p1 | transcript=LGELEM452_220010000.1 | gene=LGELEM452_220010000 | organism=Leishmania_gerbilli_strain_LEM452 | gene_product=Dynamin family, putative | transcript_product=Dynamin family, putative | location=LgeLEM452_22:177551-179344(-) | protein_length=597 | sequence_SO=chromosome | SO=protein_coding_gene | is_pseudo=false Length=597	N-terminal extension	50S ribosome-binding GTPase/Dynamin
IMPLEVGDNAVVSNSQATHGNLFHFR	1	CP029522_+_583582-584928_ORF9621	CP029522_+_583582-584928_ORF9621 [62-87]	LdCL_230021200-t42_1-p1 | transcript=LdCL_230021200-t42_1 | gene=LdCL_230021200 | organism=Leishmania_donovani_CL-SL | gene_product=hypothetical protein | transcript_product=hypothetical protein | location=CP029522:583873-584928(+) | protein_length=351 | sequence_SO=chromosome | SO=protein_coding_gene | is_pseudo=false Length=351	LmjF.23.1190:mRNA-p1 | transcript=LmjF.23.1190:mRNA | gene=LmjF.23.1190 | organism=Leishmania_major_strain_Friedlin | gene_product=hypothetical protein, conserved | transcript_product=hypothetical protein, conserved | location=LmjF.23:558544-559869(+) | protein_length=441 | sequence_SO=chromosome | SO=protein_coding_gene | is_pseudo=false Length=441	N-terminal extension	Proteins in this family include an accessory subunit of the higher eukaryotic NADH dehydrogenase complex (Complex1_LYR domain)
EYPMYPGEYVPAGHNTLSSLR	3	CP029522_+_583582-584928_ORF9621	CP029522_+_583582-584928_ORF9621 [88-108]
AEEASTIFTAATTHVVLPSSTLGSK	4	CP029525_-_246280-249642_ORF3635	CP029525_-_246280-249642_ORF3635 [88-112]	LdCL_260013700-t42_1-p1 | transcript=LdCL_260013700-t42_1 | gene=LdCL_260013700 | organism=Leishmania_donovani_CL-SL | gene_product=hypothetical protein | transcript_product=hypothetical protein | location=CP029525:246280-249117(-) | protein_length=945 | sequence_SO=chromosome | SO=protein_coding_gene | is_pseudo=false Length=945	LdBPK_260800.1.1-p1 | transcript=LdBPK_260800.1.1 | gene=LdBPK_260800.1 | organism=Leishmania_donovani_BPK282A1 | gene_product=hypothetical protein, conserved | transcript_product=hypothetical protein, conserved | location=Ld26_v01s1:242570-245824(-) | protein_length=1084 | sequence_SO=chromosome | SO=protein_coding_gene | is_pseudo=false Length=1084	N-terminal extension	Hypothetical protein (No domain)
ATKPVTEEEEIAAQFAHLK	1	CP029525_-_246280-249642_ORF3635	CP029525_-_246280-249642_ORF3635 [113-131]
GSALTLFPQDWK	3	CP029525_-_305850-307427_ORF4448	CP029525_-_305850-307427_ORF4448 [83-94]	LdCL_260015300-t42_1-p1 | transcript=LdCL_260015300-t42_1 | gene=LdCL_260015300 | organism=Leishmania_donovani_CL-SL | gene_product=Glucosidase II beta subunit-like protein, putative | transcript_product=Glucosidase II beta subunit-like protein, putative | location=CP029525:305850-306863(-) | protein_length=337 | sequence_SO=chromosome | SO=protein_coding_gene | is_pseudo=false Length=337	LGELEM452_260014700.1-p1 | transcript=LGELEM452_260014700.1 | gene=LGELEM452_260014700 | organism=Leishmania_gerbilli_strain_LEM452 | gene_product=Glucosidase II beta subunit-like/Glucosidase II beta subunit-like protein, putative | transcript_product=Glucosidase II beta subunit-like/Glucosidase II beta subunit-like protein, putative | location=LgeLEM452_26:294705-296207(-) | protein_length=500 |…	N-terminal extension	Glucosidase II beta subunit
IEVPPGGFVTADVR	1	CP029526_-_39938-41068_ORF632	CP029526_-_39938-41068_ORF632 [55-68]	LdCL_270006500-t42_1-p1 | transcript=LdCL_270006500-t42_1 | gene=LdCL_270006500 | organism=Leishmania_donovani_CL-SL | gene_product=SET domain containing protein, putative | transcript_product=SET domain containing protein, putative | location=CP029526:39938-40723(-) | protein_length=261 | sequence_SO=chromosome | SO=protein_coding_gene | is_pseudo=false Length=261	LTRL590_270006700.1-p1 | transcript=LTRL590_270006700.1 | gene=LTRL590_270006700 | organism=Leishmania_tropica_L590 | gene_product=SET domain containing protein, putative | transcript_product=SET domain containing protein, putative | location=LtrL590_27:39558-40553(-) | protein_length=331 | sequence_SO=chromosome | SO=protein_coding_gene | is_pseudo=false Length=331	N-terminal extension	SET domain containing protein
VETAWPILR	1	CP029527_-_113564-114445_ORF2114	CP029527_-_113564-114445_ORF2114 [123-131]	LdCL_280008600-t42_1-p1 | transcript=LdCL_280008600-t42_1 | gene=LdCL_280008600 | organism=Leishmania_donovani_CL-SL | gene_product=hypothetical protein | transcript_product=hypothetical protein | location=CP029527:113564-113941(-) | protein_length=125 | sequence_SO=chromosome | SO=protein_coding_gene | is_pseudo=false Length=125	LTRL590_280008500.1-p1 | transcript=LTRL590_280008500.1 | gene=LTRL590_280008500 | organism=Leishmania_tropica_L590 | gene_product=hypothetical protein, conserved | transcript_product=hypothetical protein, conserved | location=LtrL590_28:116245-116859(-) | protein_length=204 | sequence_SO=chromosome | SO=protein_coding_gene | is_pseudo=false Length=204	N-terminal extension	Hypothetical protein (No domain)
TGSFLPPPPPLSSAR	2	CP029529_-_154431-156662_ORF2286	CP029529_-_154431-156662_ORF2286 [143-157]	LdCL_300009900-t42_1-p1 | transcript=LdCL_300009900-t42_1 | gene=LdCL_300009900 | organism=Leishmania_donovani_CL-SL | gene_product=hypothetical protein | transcript_product=hypothetical protein | location=CP029529:154431-156077(-) | protein_length=548 | sequence_SO=chromosome | SO=protein_coding_gene | is_pseudo=false Length=548	LmxM.29.0470.1-p1 | transcript=LmxM.29.0470.1 | gene=LmxM.29.0470 | organism=Leishmania_mexicana_MHOM/GT/2001/U1103 | gene_product=hypothetical protein, conserved | transcript_product=hypothetical protein, conserved | location=LmxM.29:151536-153536(-) | protein_length=666 | sequence_SO=chromosome | SO=protein_coding_gene | is_pseudo=false Length=666	N-terminal extension	Hypothetical protein (No domain)
SAPGAATAASSGPYMPAYSEVK	2	CP029529_-_187016-188632_ORF2746	CP029529_-_187016-188632_ORF2746 [32-53]	LdCL_300011100-t42_1-p1 | transcript=LdCL_300011100-t42_1 | gene=LdCL_300011100 | organism=Leishmania_donovani_CL-SL | gene_product=AMP-binding enzyme, putative | transcript_product=AMP-binding enzyme, putative | location=CP029529:187016-188455(-) | protein_length=479 | sequence_SO=chromosome | SO=protein_coding_gene | is_pseudo=false Length=479	LGELEM452_300011200.1-p1 | transcript=LGELEM452_300011200.1 | gene=LGELEM452_300011200 | organism=Leishmania_gerbilli_strain_LEM452 | gene_product=AMP-binding enzyme, putative | transcript_product=AMP-binding enzyme, putative | location=LgeLEM452_30:185995-187569(-) | protein_length=524 | sequence_SO=chromosome | SO=protein_coding_gene | is_pseudo=false Length=524	N-terminal extension	AMP-binding enzyme
SAPGAATAASSGPYMPAYSEVK	2	CP029529_-_187016-188632_ORF2746	CP029529_-_187016-188632_ORF2746 [32-53]
EASASAQTLAVRPPPSAVSLAFGSSGQR	2	CP029529_-_189738-192296_ORF2792	CP029529_-_189738-192296_ORF2792 [43-70]	LdCL_300011200-t42_1-p1 | transcript=LdCL_300011200-t42_1 | gene=LdCL_300011200 | organism=Leishmania_donovani_CL-SL | gene_product=Ciliary BBSome complex subunit 2, N-terminal/Ciliary BBSome complex subunit 2, middle region/Ciliary BBSome complex subunit 2, C-terminal, putative | transcript_product=Ciliary BBSome complex subunit 2, N-terminal/Ciliary BBSome complex subunit 2, middle region/Cilia…	LdBPK_300610.1.1-p1 | transcript=LdBPK_300610.1.1 | gene=LdBPK_300610.1 | organism=Leishmania_donovani_BPK282A1 | gene_product=Bardet-Biedl syndrome 2 protein | transcript_product=Bardet-Biedl syndrome 2 protein | location=Ld30_v01s1:189992-192487(-) | protein_length=831 | sequence_SO=chromosome | SO=protein_coding_gene | is_pseudo=false Length=831	N-terminal extension	Ciliary BBSome complex subunit 2
HMTTVLDVSR	1	CP029529_-_58349-60148_ORF887	CP029529_-_58349-60148_ORF887 [66-75]	LdCL_300006900-t42_1-p1 | transcript=LdCL_300006900-t42_1 | gene=LdCL_300006900 | organism=Leishmania_donovani_CL-SL | gene_product=hypothetical protein | transcript_product=hypothetical protein | location=CP029529:58349-59827(-) | protein_length=492 | sequence_SO=chromosome | SO=protein_coding_gene | is_pseudo=false Length=492	LGELEM452_300007100.1-p1 | transcript=LGELEM452_300007100.1 | gene=LGELEM452_300007100 | organism=Leishmania_gerbilli_strain_LEM452 | gene_product=hypothetical protein, conserved | transcript_product=hypothetical protein, conserved | location=LgeLEM452_30:55840-57531(-) | protein_length=563 | sequence_SO=chromosome | SO=protein_coding_gene | is_pseudo=false Length=563	N-terminal extension	Hypothetical protein (No domain)
IPLDADETADTRPR	2	CP029529_-_754761-756293_ORF12771	CP029529_-_754761-756293_ORF12771 [221-234]	LdCL_300026800-t42_1-p1 | transcript=LdCL_300026800-t42_1 | gene=LdCL_300026800 | organism=Leishmania_donovani_CL-SL | gene_product=Oligomerization domain containing protein, putative | transcript_product=Oligomerization domain containing protein, putative | location=CP029529:754761-755369(-) | protein_length=202 | sequence_SO=chromosome | SO=protein_coding_gene | is_pseudo=false Length=202	LmxM.29.2120.1-p1 | transcript=LmxM.29.2120.1 | gene=LmxM.29.2120 | organism=Leishmania_mexicana_MHOM/GT/2001/U1103 | gene_product=Oligomerisation domain containing protein, putative | transcript_product=Oligomerisation domain containing protein, putative | location=LmxM.29:743237-744841(-) | protein_length=534 | sequence_SO=chromosome | SO=protein_coding_gene | is_pseudo=false Length=534	N-terminal extension	Oligomerization domain containing protein
GVDTPEYTIICAQAPDAAR	5	CP029529_+_240519-243950_ORF4304	CP029529_+_240519-243950_ORF4304 [22-40]	| transcript=LdCL_300013200-t42_1 | gene=LdCL_300013200 | organism=Leishmania_donovani_CL-SL | gene_product=hypothetical protein | transcript_product=hypothetical protein | location=CP029529:240774-243950(+) | protein_length=1058 | sequence_SO=chromosome | SO=protein_coding_gene | is_pseudo=false Length=1058	LTRL590_300013400.1-p1 | transcript=LTRL590_300013400.1 | gene=LTRL590_300013400 | organism=Leishmania_tropica_L590 | gene_product=Armadillo/beta-catenin-like repeats, putative | transcript_product=Armadillo/beta-catenin-like repeats, putative | location=LtrL590_30:244303-247716(+) | protein_length=1137 | sequence_SO=chromosome | SO=protein_coding_gene | is_pseudo=false Length=1137	N-terminal extension	Hypothetical protein (No domain)
GVDTPEYTIICAQAPDAAR	3	CP029529_+_240519-243950_ORF4304	CP029529_+_240519-243950_ORF4304 [22-40]
LQTSTESSAAQNVTLLLR	6	CP029529_+_240519-243950_ORF4304	CP029529_+_240519-243950_ORF4304 [49-66]
STLLSLLAGR	2	CP029529_+_460443-462116_ORF7523	CP029529_+_460443-462116_ORF7523 [57-66]	LdCL_300019100-t42_1-p1 | transcript=LdCL_300019100-t42_1 | gene=LdCL_300019100 | organism=Leishmania_donovani_CL-SL | gene_product=ATP-binding cassette protein subfamily H, member 3, putative | transcript_product=ATP-binding cassette protein subfamily H, member 3, putative | location=CP029529:460791-462116(+) | protein_length=441 | sequence_SO=chromosome | SO=protein_coding_gene | is_pseudo=fals…	LAEL147_000561000.1-p1 | transcript=LAEL147_000561000.1 | gene=LAEL147_000561000 | organism=Leishmania_aethiopica_L147 | gene_product=ATP-binding cassette protein subfamily H, member 3, putative | transcript_product=ATP-binding cassette protein subfamily H, member 3, putative | location=CM007207.1:464327-465928(+) | protein_length=533 | sequence_SO=chromosome | SO=protein_coding_gene | is_pseudo=…	N-terminal extension	ATP-binding cassette protein subfamily H, member 3
SNELYDLFSR	1	CP029531_-_21851-22801_ORF388	CP029531_-_21851-22801_ORF388 [8-17]	LdCL_320005600-t42_1-p1 | transcript=LdCL_320005600-t42_1 | gene=LdCL_320005600 | organism=Leishmania_donovani_CL-SL | gene_product=Qa-SNARE protein | transcript_product=Qa-SNARE protein | location=CP029531:21851-22588(-) | protein_length=245 | sequence_SO=chromosome | SO=protein_coding_gene | is_pseudo=false Length=245	LAEL147_000621400.1-p1 | transcript=LAEL147_000621400.1 | gene=LAEL147_000621400 | organism=Leishmania_aethiopica_L147 | gene_product=Qa-SNARE protein | transcript_product=Qa-SNARE protein | location=CM007209.1:21070-21993(-) | protein_length=307 | sequence_SO=chromosome | SO=protein_coding_gene | is_pseudo=false Length=307	N-terminal extension	Qa-SNARE protein
SIPFFTNSDSALAR	1	CP029531_+_1193499-1196159_ORF20474	CP029531_+_1193499-1196159_ORF20474 [77-90]	LdCL_320037500-t42_1-p1 | transcript=LdCL_320037500-t42_1 | gene=LdCL_320037500 | organism=Leishmania_donovani_CL-SL | gene_product=hypothetical protein | transcript_product=hypothetical protein | location=CP029531:1193880-1196159(+) | protein_length=759 | sequence_SO=chromosome | SO=protein_coding_gene | is_pseudo=false Length=759	LmjF.32.2990.2:mRNA-p1 | transcript=LmjF.32.2990.2:mRNA | gene=LmjF.32.2990 | organism=Leishmania_major_strain_Friedlin | gene_product=hypothetical protein, conserved | transcript_product=hypothetical protein, conserved | location=LmjF.32:1174225-1176783(+) | protein_length=852 | sequence_SO=chromosome | SO=protein_coding_gene | is_pseudo=false Length=852	N-terminal extension	Hypothetical protein (Armadillo/beta-catenin-like repeats)
LSELESLK	1	CP029531_+_1399143-1402085_ORF23463	CP029531_+_1399143-1402085_ORF23463 [120-127]	LdCL_320042200-t42_1-p1 | transcript=LdCL_320042200-t42_1 | gene=LdCL_320042200 | organism=Leishmania_donovani_CL-SL | gene_product=Uncharacterized protein family UPF0564, putative | transcript_product=Uncharacterized protein family UPF0564, putative | location=CP029531:1399668-1402085(+) | protein_length=805 | sequence_SO=chromosome | SO=protein_coding_gene | is_pseudo=false Length=805	LAEL147_000658900.1-p1 | transcript=LAEL147_000658900.1 | gene=LAEL147_000658900 | organism=Leishmania_aethiopica_L147 | gene_product=Uncharacterised protein family UPF0564, putative | transcript_product=Uncharacterised protein family UPF0564, putative | location=CM007209.1:1384002-1386860(+) | protein_length=952 | sequence_SO=chromosome | SO=protein_coding_gene | is_pseudo=false Length=952	N-terminal extension	Uncharacterized protein family UPF0564
GQFNPIHAFTEHSISPAK	4	CP029532_+_1061790-1064060_ORF16791	CP029532_+_1061790-1064060_ORF16791 [38-55]	LdCL_330033500-t42_1-p1 | transcript=LdCL_330033500-t42_1 | gene=LdCL_330033500 | organism=Leishmania_donovani_CL-SL | gene_product=mitochondrial RNA binding complex 1 subunit | transcript_product=mitochondrial RNA binding complex 1 subunit | location=CP029532:1062027-1064060(+) | protein_length=677 | sequence_SO=chromosome | SO=protein_coding_gene | is_pseudo=false Length=677	LGELEM452_330034400.1-p1 | transcript=LGELEM452_330034400.1 | gene=LGELEM452_330034400 | organism=Leishmania_gerbilli_strain_LEM452 | gene_product=mitochondrial RNA binding complex 1 subunit, putative | transcript_product=mitochondrial RNA binding complex 1 subunit, putative | location=LgeLEM452_33:1007877-1010105(+) | protein_length=742 | sequence_SO=chromosome | SO=protein_coding_gene | is_pseu…	N-terminal extension	Mitochondrial RNA binding complex 1 subunit
SMNIAIANIAPTR	2	CP029532_+_223759-225072_ORF3958	CP029532_+_223759-225072_ORF3958 [115-127]	LdCL_330012200-t42_1-p1 | transcript=LdCL_330012200-t42_1 | gene=LdCL_330012200 | organism=Leishmania_donovani_CL-SL | gene_product=intraflagellar transport protein 57/55, putative | transcript_product=intraflagellar transport protein 57/55, putative | location=CP029532:224164-225072(+) | protein_length=302 | sequence_SO=chromosome | SO=protein_coding_gene | is_pseudo=false Length=302	LdBPK.33.2.000670.1-p1 | transcript=LdBPK.33.2.000670.1 | gene=LdBPK.33.2.000670 | organism=Leishmania_donovani_strain_LV9 | gene_product=Intra-flagellar transport protein 57, putative | transcript_product=Intra-flagellar transport protein 57, putative | location=LdLV9_33_v1_pilon:240640-241893(+) | protein_length=417 | sequence_SO=chromosome | SO=protein_coding_gene | is_pseudo=false Length=417	N-terminal extension	Intraflagellar transport protein 57/55
HMSVTDSFPTQQTPSGALQQEATER	1	CP029533_-_688571-690862_ORF11587	CP029533_-_688571-690862_ORF11587 [155-179]	LdCL_340021800-t42_1-p1 | transcript=LdCL_340021800-t42_1 | gene=LdCL_340021800 | organism=Leishmania_donovani_CL-SL | gene_product=R3H-associated N-terminal domain containing protein, putative | transcript_product=R3H-associated N-terminal domain containing protein, putative | location=CP029533:688571-690139(-) | protein_length=522 | sequence_SO=chromosome | SO=protein_coding_gene | is_pseudo=fa…	LARLEM1108_340017700.1-p1 | transcript=LARLEM1108_340017700.1 | gene=LARLEM1108_340017700 | organism=Leishmania_arabica_strain_LEM1108 | gene_product=R3H-associated N-terminal domain containing protein, putative | transcript_product=R3H-associated N-terminal domain containing protein, putative | location=LarLEM1108_34:494247-496280(-) | protein_length=677 | sequence_SO=chromosome | SO=protein_cod…	N-terminal extension	R3H-associated N-terminal domain containing protein
LFSRPDLAVVAVR	1	CP029534_-_1340868-1342346_ORF22803	CP029534_-_1340868-1342346_ORF22803 [89-101]	LdCL_350040100-t42_1-p1 | transcript=LdCL_350040100-t42_1 | gene=LdCL_350040100 | organism=Leishmania_donovani_CL-SL | gene_product=Peroxidase, putative | transcript_product=Peroxidase, putative | location=CP029534:1340868-1341977(-) | protein_length=369 | sequence_SO=chromosome | SO=protein_coding_gene | is_pseudo=false Length=369	LmjF.35.3460:mRNA-p1 | transcript=LmjF.35.3460:mRNA | gene=LmjF.35.3460 | organism=Leishmania_major_strain_Friedlin | gene_product=peroxidase, putative | transcript_product=peroxidase, putative | location=LmjF.35:1401048-1402460(-) | protein_length=470 | sequence_SO=chromosome | SO=protein_coding_gene | is_pseudo=false Length=470	N-terminal extension	Peroxidase
VPPQPDFSK	7	CP029534_-_24461-25405_ORF395	CP029534_-_24461-25405_ORF395 [5-13]	LdCL_350005700-t42_1-p1 | transcript=LdCL_350005700-t42_1 | gene=LdCL_350005700 | organism=Leishmania_donovani_CL-SL | gene_product=prohibitin, putative | transcript_product=prohibitin, putative | location=CP029534:24461-25339(-) | protein_length=292 | sequence_SO=chromosome | SO=protein_coding_gene | is_pseudo=false Length=292	LTULEM423_350005600.1-p1 | transcript=LTULEM423_350005600.1 | gene=LTULEM423_350005600 | organism=Leishmania_turanica_strain_LEM423 | gene_product=prohibitin, putative | transcript_product=prohibitin, putative | location=LtuLEM423_35:16136-17053(-) | protein_length=305 | sequence_SO=chromosome | SO=protein_coding_gene | is_pseudo=false Length=305	N-terminal extension	Prohibitin
TFTFSIPVAQLTHPPVVR	2	CP029534_+_1895967-1899044_ORF30821	CP029534_+_1895967-1899044_ORF30821 [78-95]	LdCL_350055700-t42_1-p1 | transcript=LdCL_350055700-t42_1 | gene=LdCL_350055700 | organism=Leishmania_donovani_CL-SL | gene_product=hypothetical protein | transcript_product=hypothetical protein | location=CP029534:1896354-1899044(+) | protein_length=896 | sequence_SO=chromosome | SO=protein_coding_gene | is_pseudo=false Length=896	LGELEM452_350056900.1-p1 | transcript=LGELEM452_350056900.1 | gene=LGELEM452_350056900 | organism=Leishmania_gerbilli_strain_LEM452 | gene_product=hypothetical protein, conserved | transcript_product=hypothetical protein, conserved | location=LgeLEM452_35:1844156-1847203(+) | protein_length=1015 | sequence_SO=chromosome | SO=protein_coding_gene | is_pseudo=false Length=1015	N-terminal extension	Hypothetical protein (Intra-flagellar transport (IFT57 domain))
APMTFEFGEECNNLAR	4	CP029534_+_265148-267310_ORF3618	CP029534_+_265148-267310_ORF3618 [77-92]	LdCL_350011700-t42_1-p1 | transcript=LdCL_350011700-t42_1 | gene=LdCL_350011700 | organism=Leishmania_donovani_CL-SL | gene_product=Tetratricopeptide repeat/TPR repeat, putative | transcript_product=Tetratricopeptide repeat/TPR repeat, putative | location=CP029534:265442-267310(+) | protein_length=622 | sequence_SO=chromosome | SO=protein_coding_gene | is_pseudo=false Length=622	LTRL590_350011600.1-p1 | transcript=LTRL590_350011600.1 | gene=LTRL590_350011600 | organism=Leishmania_tropica_L590 | gene_product=Tetratricopeptide repeat, putative | transcript_product=Tetratricopeptide repeat, putative | location=LtrL590_35:242170-244272(+) | protein_length=700 | sequence_SO=chromosome | SO=protein_coding_gene | is_pseudo=false Length=700	N-terminal extension	Tetratricopeptide repeat/TPR
APMTFEFGEECNNLAR	6	CP029534_+_265148-267310_ORF3618	CP029534_+_265148-267310_ORF3618 [77-92]
DVSLGSDKEPPVFK	2	CP029535_-_2394974-2396395_ORF40624	CP029535_-_2394974-2396395_ORF40624 [70-83]	LdCL_360071700-t42_1-p1 | transcript=LdCL_360071700-t42_1 | gene=LdCL_360071700 | organism=Leishmania_donovani_CL-SL | gene_product=hypothetical protein | transcript_product=hypothetical protein | location=CP029535:2394974-2395945(-) | protein_length=323 | sequence_SO=chromosome | SO=protein_coding_gene | is_pseudo=false Length=323	LGELEM452_360072700.1-p1 | transcript=LGELEM452_360072700.1 | gene=LGELEM452_360072700 | organism=Leishmania_gerbilli_strain_LEM452 | gene_product=hypothetical protein, conserved | transcript_product=hypothetical protein, conserved | location=LgeLEM452_36:2328736-2329959(-) | protein_length=407 | sequence_SO=chromosome | SO=protein_coding_gene | is_pseudo=false Length=407	N-terminal extension	Hypothetical protein (No domain)
