# Supplementary material for: Identification of new protein-coding potential in Leishmania donovani using a proteogenomics approach
Source: Research Square preprint supplement (doi:10.21203/rs.3.rs-8719077/v1), 2026-02-13
Supplement: Supplementary file 5 [file a1b664c7a05840fec6f07168.xlsx]

## Sheet: Sheet1
Chowdhury et al. (2025). Identification of N-terminal extensions in Leishmania donovani using a proteogenomics approach Supplementary Table 2: N-terminal extensions in promastigote stages of Leishmania donovani
Note: Peptide-level evidence for these proteins is visualised in Supplementary Figure 2.
Peptide sequence	# PSMs	Master Protein Accessions	Positions in Master Proteins	Other Leishmania species orthologs	Category	Description (Domain structure)
EPMGHEETTFSR	3	CP029503_-_461522-462052_ORF6515	CP029503_-_461522-462052_ORF6515 [16-27]	LGELEM452_040017600.1-p1 | transcript=LGELEM452_040017600.1 | gene=LGELEM452_040017600 | organism=Leishmania_gerbilli_strain_LEM452 | gene_product=hypothetical protein | transcript_product=hypothetical protein | location=LgeLEM452_04:442691-442951(-) | protein_length=86 | sequence_SO=chromosome | SO=protein_coding_gene | is_pseudo=false Length=86	Novel	Cytochrome oxidase c subunit VIb
EPMGHEETTFSR	2	CP029503_-_461522-462052_ORF6515	CP029503_-_461522-462052_ORF6515 [16-27]
MFLGGFVPR	13	CP029526_+_668443-668685_ORF10738	CP029526_+_668443-668685_ORF10738 [1-9]	LGELEM452_270022800.1-p1 | transcript=LGELEM452_270022800.1 | gene=LGELEM452_270022800 | organism=Leishmania_gerbilli_strain_LEM452 | gene_product=hypothetical protein | transcript_product=hypothetical protein | location=LgeLEM452_27:640019-640207(+) | protein_length=62 | sequence_SO=chromosome | SO=protein_coding_gene | is_pseudo=false Length=62	Novel	Hypothetical protein (Structural domain found in the N-terminal glutamine amidohydrolase (Nt Q -amidase) family of proteins (Nt_Gln_amidase domain))
MFLGGFVPR	2	CP029526_+_668443-668685_ORF10738	CP029526_+_668443-668685_ORF10738 [1-9]
DLVLDPHR	2	CP029526_+_668443-668685_ORF10738	CP029526_+_668443-668685_ORF10738 [45-52]
MFLGGFVPR	3	CP029526_+_668443-668685_ORF10738	CP029526_+_668443-668685_ORF10738 [1-9]
MFLGGFVPR	5	CP029526_+_668443-668685_ORF10738	CP029526_+_668443-668685_ORF10738 [1-9]
YVWSHLDDHH	3	CP029526_+_668443-668685_ORF10738	CP029526_+_668443-668685_ORF10738 [53-62]
MFLGGFVPR	1	CP029526_+_668443-668685_ORF10738	CP029526_+_668443-668685_ORF10738 [1-9]
DLVLDPHR	1	CP029526_+_668443-668685_ORF10738	CP029526_+_668443-668685_ORF10738 [45-52]
HSFADFFR	4	CP029531_+_1192549-1193376_ORF20451	CP029531_+_1192549-1193376_ORF20451 [234-241]	KAG5470292.1 | transcript=LSCM4_02987_t1 | gene=LSCM4_02987 | organism=Leishmania_orientalis_MHOM/TH/2014/LSCM4 | gene_product=unspecified product | transcript_product=unspecified product | location=CM030463:1202667-1203392(+) | protein_length=241 | sequence_SO=chromosome | SO=protein_coding_gene | is_pseudo=false Length=241	Novel	Hypothetical protein (Transmembrane region)
CLDTLPEDPEKECAAQK	4	CP029531_+_1197396-1197695_ORF20552	CP029531_+_1197396-1197695_ORF20552 [20-36]	LTRL590_320038000.1-p1 | transcript=LTRL590_320038000.1 | gene=LTRL590_320038000 | organism=Leishmania_tropica_L590 | gene_product=Cytochrome oxidase c subunit VIb, putative | transcript_product=Cytochrome oxidase c subunit VIb, putative | location=LtrL590_32:1200272-1200487(+) | protein_length=71 | sequence_SO=chromosome | SO=protein_coding_gene | is_pseudo=false Length=71	Novel	Hypothetical protein (Cytochrome c oxidase (COX6B domain))
SWVSYFEK	2	CP029531_+_1197396-1197695_ORF20552	CP029531_+_1197396-1197695_ORF20552 [46-53]
KDVESFLR	1	CP029532_+_1155816-1157342_ORF18195	CP029532_+_1155816-1157342_ORF18195 [159-166]	CAC5433493.1 | transcript=LDHU3_33.4010_t1 | gene=LDHU3_33.4010 | organism=Leishmania_donovani_HU3 | gene_product=Hypothetical protein [Source:UniProtKB/TrEMBL;Acc:A0A6J8FQQ4] | transcript_product=Hypothetical protein [Source:UniProtKB/TrEMBL;Acc:A0A6J8FQQ4] | location=LR812653:1192538-1193944(+) | protein_length=468 | sequence_SO=chromosome | SO=protein_coding_gene | is_pseudo=false Length=468	Novel	Hypothetical protein (No domain)
SFIFQLR	1	CP029532_+_1155816-1157342_ORF18195	CP029532_+_1155816-1157342_ORF18195 [144-150]
WNYTQAYK	1	CP029535_-_2820110-2820433_ORF46956	CP029535_-_2820110-2820433_ORF46956 [75-82]	LTRL590_360080700.1-p1 | transcript=LTRL590_360080700.1 | gene=LTRL590_360080700 | organism=Leishmania_tropica_L590 | gene_product=hypothetical protein | transcript_product=hypothetical protein | location=LtrL590_36:2619809-2620066(-) | protein_length=85 | sequence_SO=chromosome | SO=protein_coding_gene | is_pseudo=false Length=85	Novel	Hypothetical protein (Transmembrane region)
